# Supplementary material for: Induction of Liver Steatosis and Lipid Droplet Formation in ATF6α-Knockout Mice Burdened with Pharmacological Endoplasmic Reticulum Stress
Source: PubMed Central journal article supplement — Mol Biol Cell. 2010 Sep 1;21(17):2975–86. doi: 10.1091/mbc.E09-02-0133 (PMC2929991; doi:10.1091/mbc.e09-02-0133), 2010-09-01

**Supplemental Fig. 1 Effect of tunicamycin injection on albumin in the serum of ATF6a +/+ and -/- mice**

Tunicamycin (Tm) was injected into ATF6a +/+ and -/- mice as in Fig. 1A. Albumin levels in serum were determined at the indicated time points after injection and are presented as the means  $\pm$  SEM (n=4).

Supplemental Fig. 1

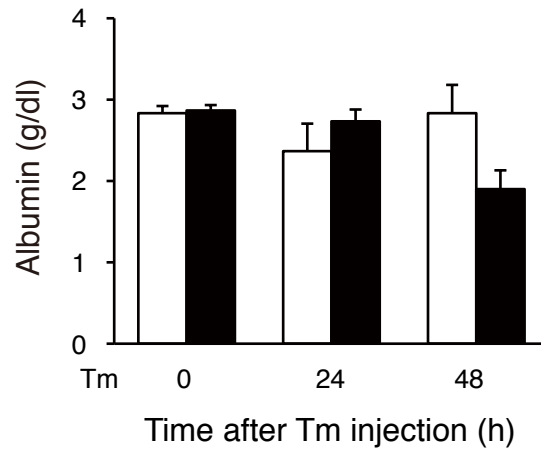

Supplement: E09-02-0133_1.pdf [file E09-02-0133_1.pdf]
